# Supplementary material
Source: PubMed Central journal article supplement (PMC6109915)
Supplement: supp_RA118.002027_135468_1_supp_143573_p9dhr4.pdf [file supp_RA118.002027_135468_1_supp_143573_p9dhr4.pdf]

**Supplemental Figure 1.** Downregulation of PRMT1 expression attenuates the TGF- $\beta$ -induced EMT of HaCaT cells, as shown using two different siRNAs. (A, B) HaCaT cells, transfected with PRMT1 siRNA #4, PRMT1 siRNA #7, or control siRNA, were treated with TGF- $\beta$  for 48 or 72 h to induce EMT or were left untreated. The relative expression of PRMT1 (A) and PAI1 (B) mRNA was quantified by q-RT-PCR. \*  $p < 0.05$  and #  $p < 0.0001$  vs. control siRNA at the same time point. (C) Downregulation of PRMT1 expression following transfection with either PRMT1 siRNA #4 or PRMT1 siRNA #7 reduced the TGF- $\beta$ -induced increase in fibronectin expression and decrease in claudin1 expression.

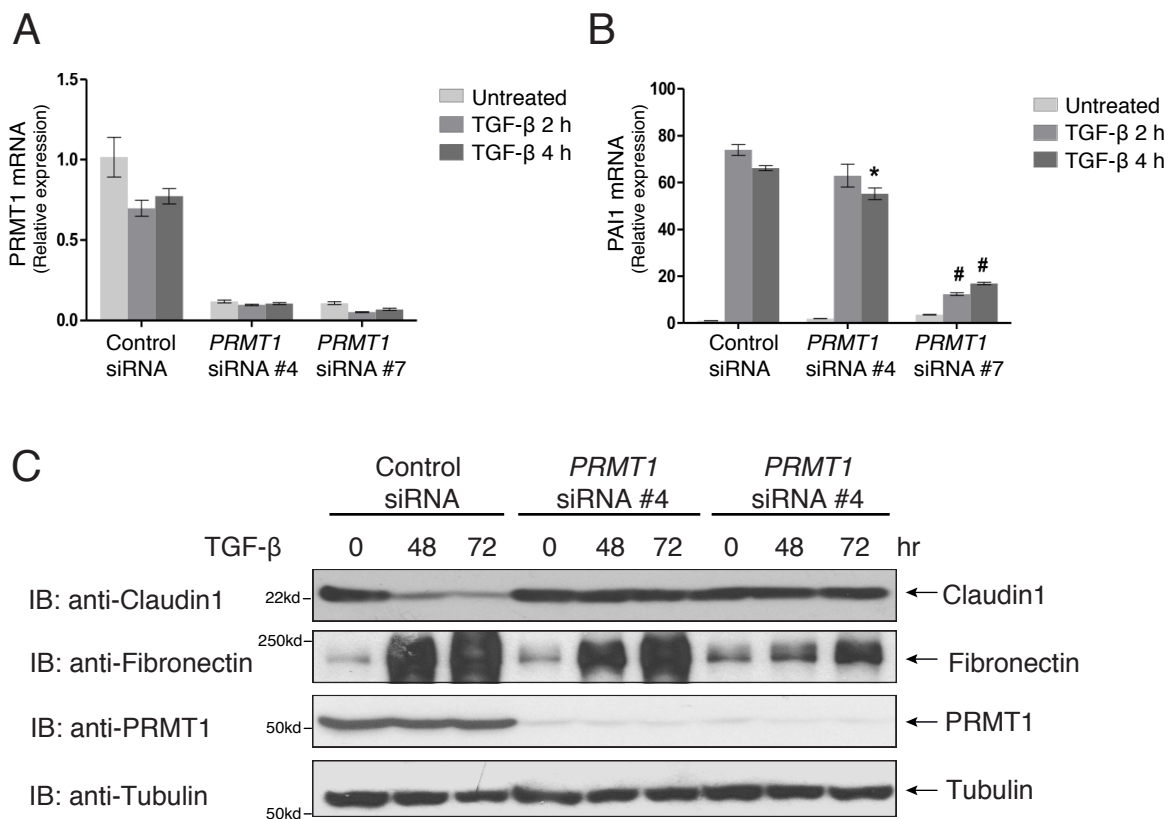

Figure S1. Katsuno et al.

**Table S1: qRT-PCR primer sequences**

| Gene (human)       | Forward primer (5'→3')   | Reverse primer (5'→3')      |
|--------------------|--------------------------|-----------------------------|
| <i>PAI1</i>        | TTCAGCCCTTGCTTGCCCTC     | ACACTTTTACTCCGAAGTCGGT      |
| <i>Smad7</i>       | TGCTGTGAATCTTACGGGAAG    | AATCCATCGGGTATCTGGAG        |
| <i>E-cadherin</i>  | TGCACCAACCCTCATGAGTG     | GTCAGTATCAGCCGCTTTCAG       |
| <i>N-cadherin</i>  | ACAGTGGCCACCTACAAAGG     | CCGAGATGGGGTTGATAATG        |
| <i>Fibronectin</i> | TCCCTCGGAACATCAGAAAC     | CAGTGGGAGACCTCGAGAAG        |
| <i>Vimentin</i>    | GACGCCATCAACACCGAGTT     | CTTTGTCGTTGGTTAGCTGGT       |
| <i>ZEB1</i>        | GCACCTGAAGAGGACCAGAG     | TGCATCTGGTGTTCATTTT         |
| <i>ZEB2</i>        | AAGCCCCATCAACCCATACAAG   | AAATTCCTGAGGAAGGCCCA        |
| <i>Snail</i>       | TTCTCACTGCCATGGAATTCC    | GCAGAGGACACAGAACCAGAAA      |
| <i>Slug</i>        | GCCTCCAAAAAGCCAACTACA    | GAGGATCTCTGGTTGTGGTATGACA   |
| <i>CD44</i>        | TCAGAGGAGTAGGAGAGAGGAAAC | GAAAAGTCAAAGTAACAATAACAGTGG |
| <i>KLF4</i>        | CCGCTCCATTACCAAGAGCT     | ATCGTCTTCCCCTCTTTGGC        |
| <i>BMI1</i>        | TGGAGAAGGAATGGTCCACTTC   | GTGAGGAAACTGTGGATGAGGA      |
| <i>POU5F1</i>      | GTGGAGAGCAACTCCGATG      | TGCTCCAGCTTCTCCTTCTC        |
| <i>NANOG</i>       | ATTCAGGACAGCCCTGATTCTTC  | TTTTTGCGACACTTCTCTGTC       |
| <i>RPL19</i>       | ATGAGTATGCTCAGGCTACAGA   | GCATTGGCGATTTTCATTGGTC-3    |
